# Supplementary material for: Low seroprevalence of Ebola virus in health care providers in an endemic region (Tshuapa province) of the Democratic Republic of the Congo
Source: bioRxiv or medRxiv preprint supplement (doi:10.1101/2023.01.28.23285137), 2023-01-30
Supplement: Supplementary file [file media-1.pdf]

1 **Supplement:** Seroprevalence with cut off obtained from literature for different (combinations of) antibodies against Ebola  
 2 virus antigens as measured by the Luminex or FANG ELISA in Health care providers from Boende, DRC.

|                               | Antigen                      | Cutoff            | Positives | Seroprevalence     | Age /year    | M vs F  | Direct Contact with patients: Direct vs indirect | Working Hospital vs elsewhere | Experienced Ebola outbreak/patients vs others |
|-------------------------------|------------------------------|-------------------|-----------|--------------------|--------------|---------|--------------------------------------------------|-------------------------------|-----------------------------------------------|
|                               |                              |                   | n (N)     | % (95% conf. Int.) | p-value      | p-value | (p-value)                                        | (p-value)                     | p-value                                       |
| <b>FANG ELISA</b>             | <b>GP-EBOV-m</b>             | 607 EU/ml         | 49 (694)  | 7                  | 0.73         | 0.35    | 0.24                                             | 0.67                          | 0.61                                          |
|                               | <b>GP-EBOV-m</b>             | 381 MFI/100 beads | 104 (698) | 14                 | <b>0.005</b> | 0.22    | 0.05                                             | 0.81                          | 0.24                                          |
|                               | <b>GP-EBOV-k</b>             | 501 MFI/100 beads | 89 (698)  | 13                 | <b>0.02</b>  | 0.81    | 0.05                                             | 0.99                          | 0.45                                          |
|                               | <b>VP40-EBOV-m</b>           | 580 MFI/100 beads | 69 (698)  | 10                 | 0.14         | 0.11    | 0.41                                             | 0.35                          | 0.16                                          |
| <b>Luminex</b>                | <b>NP-EBOV-m</b>             | 950 MFI/100 beads | 8 (698)   | 1                  | 0.54         | 0.57    | 0.31                                             | 0.16                          | 0.08                                          |
|                               | <b>GP-EBOV-m+NP-EBOV-m</b>   | C1                | 0 (698)   | 0                  |              |         |                                                  |                               |                                               |
|                               | <b>GP-EBOV-m+VP40-EBOV-m</b> | C2                | 19 (698)  | 3                  | 0.92         | 0.37    | 0.91                                             | 0.38                          | 0.13                                          |
|                               | <b>NP-EBOV-m+VP40-EBOV-m</b> | C3                | 2 (698)   | 0.2                |              |         |                                                  |                               |                                               |
| <b>Luminex and FANG ELISA</b> | <b>GP-EBOV-m</b>             | C4                | 6 (694)   | 0.8                |              |         |                                                  |                               |                                               |

3 \*cutoff (C) represent values obtained from literature and previous studies

4 C1= 381 MFI/100 beads for GP-EBOV-m and 580MFI/100 beads for NP-EBOV-m

5 C2=381 MFI/100 beads for GP-EBOV-m and 950 MFI/100 beads for VP40-EBOV-m

6 C3= 950 MFI/100 beads for NP-EBOV-m and 580 MFI/100 beads for VP40-EBOV-m

7 C4= 607 EU/ml and 381MFI/100beads for GP-EBOV-k and GP-EBOV-m
